# Supplementary material for: Airborne microbial biodiversity and seasonality in Northern and Southern Sweden
Source: PeerJ. 2020 Jan 27;8:e8424. doi: 10.7717/peerj.8424 (PMC6991134; doi:10.7717/peerj.8424)
Supplement: Table S1 [file peerj-08-8424-s001.xlsx]

## Sheet: Sheet1
Amplicon concentrations used for sequencing						rbcL (Plants)							16S-V4 (Bacteria)						ITS (Fungi)
#	Sample ID	Location	Year	Week	DNA extraction Batch	Amp. conc. (ng/µl)	Amp. conc. (nM1)	Final amp. conc. for seq library (nM2)	Pooled volume for seq library (V)	Normalization coeff. ([nM]1/[nM]2)/[V]	Sequencing run	Sequencing read length (bp)	Amp. conc. (ng/µl)	Amp. conc. (nM1)	Final amp. conc. for seq library (nM2)	Pooled volume for seq library (V)	Sequencing run	Sequencing read length (bp)	Amp. conc. (ng/µl)	Amp. conc. (nM1)	Final amp. conc. for seq library (nM2)	Pooled volume for seq library (V)	Sequencing run	Sequencing read length (bp)
1	Air_20161114_1	Ljungbyhed	2006	49	1	0.068	0.332356	0.332356	0.765625	1.30612	3	2 × 250	3.46	12.1917	5	1	2	2 × 300	3.42	12.3377	8	1.10526	1	2 × 300
2	Air_20161114_2	Kiruna	2006	15	1	0.213	1.04106	1.04106	1.3125	0.761905	3	2 × 250	0.713	2.51233	2.51233	1	2	2 × 300	0.859	3.09885	3.09885	0.859649	1	2 × 300
3	Air_20161114_3	Ljungbyhed	2007	19	1	3.23	15.7869	9	1.3125	1.33646	3	2 × 250	4.47	15.7505	5	1	2	2 × 300	1.31	4.72583	4	1.10526	1	2 × 300
4	Air_20161114_4	Ljungbyhed	2006	13	1	0.052	0.254154	0.254154	0.765625	1.30612	3	2 × 250	2.34	8.24524	5	1	2	2 × 300	0.695	2.50722	2.50722	0.859649	1	2 × 300
5	Air_20161114_5	Kiruna	2006	23	1	3.67	17.9374	9	1.3125	1.51851	3	2 × 250	11.1	39.1121	5	1	2	2 × 300	36.8	132.756	8	1.10526	1	2 × 300
6	Air_20161114_6	Kiruna	2006	7	1	0.05	0.244379	0.244379	0.765625	1.30612	3	2 × 250	0.169	0.59549	0.59549	1	2	2 × 300	0.055	0.198413	0.198413	0.859649	1	2 × 300
7	Air_20161114_7	Ljungbyhed	2006	3	1	0	0	0	0.65625	1.52381	3	2 × 250	0.169	0.59549	0.59549	1	2	2 × 300	0	0	0	0.859649	1	2 × 300
8	Air_20161114_8	Kiruna	2007	13	1	0.096	0.469208	0.469208	0.765625	1.30612	3	2 × 250	0.924	3.25581	3.25581	1	2	2 × 300	5.37	19.3723	8	1.10526	1	2 × 300
9	Air_20161114_9	Ljungbyhed	2007	49	1	0	0	0	0.65625	1.52381	3	2 × 250	1.71	6.02537	5	1	2	2 × 300	0.122	0.440115	0.440115	0.859649	1	2 × 300
10	Air_20161114_10	Ljungbyhed	2007	17	1	0.084	0.410557	0.410557	0.765625	1.30612	3	2 × 250	3.26	11.487	5	1	2	2 × 300	1.55	5.59163	4	1.10526	1	2 × 300
11	Air_20161114_11	Ljungbyhed	2006	41	1	0.083	0.40567	0.40567	0.765625	1.30612	3	2 × 250	1.93	6.80056	5	1	2	2 × 300	2.81	10.1371	8	1.10526	1	2 × 300
12	Air_20161114_12	Ljungbyhed	2006	7	1	0	0	0	0.65625	1.52381	3	2 × 250	0.053	0.186751	0.186751	1	2	2 × 300	0	0	0	0.859649	1	2 × 300
13	Air_20161114_13	Kiruna	2006	49	1	0.068	0.332356	0.332356	0.765625	1.30612	3	2 × 250	0.808	2.84708	2.84708	1	2	2 × 300	0.381	1.37446	1.37446	0.859649	1	2 × 300
14	Air_20161114_14	Kiruna	2006	1	1	0.109	0.532747	0.532747	0.765625	1.30612	3	2 × 250	0.151	0.532065	0.532065	1	2	2 × 300	0.308	1.11111	1.11111	0.859649	1	2 × 300
105	Air_20161114_105	Blank_1			1	0	0	0	0.65625	1.52381	3	2 × 250	0.054	0.190275	0.190275	1	2	2 × 300	0.091	0.328283	0.328283	0.859649	1	2 × 300
15	Air_20161115_15	Kiruna	2006	37	2	5.88	28.739	9	1.3125	2.43293	3	2 × 250	5.52	19.4503	5	1	2	2 × 300	4.29	15.4762	8	1.10526	1	2 × 300
16	Air_20161115_16	Ljungbyhed	2006	35	2	4.73	23.1183	9	1.3125	1.9571	3	2 × 250	15.3	53.9112	5	1	2	2 × 300	16	57.7201	8	1.10526	1	2 × 300
17	Air_20161115_17	Kiruna	2007	43	2	3.04	14.8583	9	1.3125	1.25784	3	2 × 250	8.35	29.4221	5	1	2	2 × 300	37	133.478	8	1.10526	1	2 × 300
18	Air_20161115_18	Kiruna	2006	41	2	1.66	8.11339	7	1.3125	0.88309	3	2 × 250	4.49	15.821	5	1	2	2 × 300	21.9	79.0043	8	1.10526	1	2 × 300
19	Air_20161115_19	Ljungbyhed	2007	5	2	0.468	2.28739	2.28739	1.3125	0.761905	3	2 × 250	4.33	15.2572	5	1	2	2 × 300	7.3	26.3348	8	1.10526	1	2 × 300
20	Air_20161115_20	Ljungbyhed	2006	43	2	3.92	19.1593	9	1.3125	1.62195	3	2 × 250	7.49	26.3918	5	1	2	2 × 300	17	61.3276	8	1.10526	1	2 × 300
21	Air_20161115_21	Ljungbyhed	2007	29	2	4.09	19.9902	9	1.3125	1.69229	3	2 × 250	7.24	25.5109	5	1	2	2 × 300	3.58	12.9149	8	1.10526	1	2 × 300
22	Air_20161115_22	Kiruna	2007	27	2	5.9	28.8368	9	1.3125	2.44121	3	2 × 250	9.76	34.3904	5	1	2	2 × 300	16.9	60.9668	8	1.10526	1	2 × 300
23	Air_20161115_23	Ljungbyhed	2007	35	2	2.09	10.2151	9	1.3125	0.864766	3	2 × 250	5.88	20.7188	5	1	2	2 × 300	10.2	36.7965	8	1.10526	1	2 × 300
24	Air_20161115_24	Ljungbyhed	2007	27	2	0.316	1.54448	1.54448	1.3125	0.761905	3	2 × 250	1.7	5.99013	5	1	2	2 × 300	5.06	18.254	8	1.10526	1	2 × 300
25	Air_20161115_25	Kiruna	2006	45	2	0.057	0.278592	0.278592	0.765625	1.30612	3	2 × 250	0.988	3.48132	3.48132	1	2	2 × 300	0.808	2.91486	2.91486	0.859649	1	2 × 300
26	Air_20161115_26	Ljungbyhed	2006	25	2	0.504	2.46334	2.46334	1.3125	0.761905	3	2 × 250	4.63	16.3143	5	1	2	2 × 300	0.876	3.16017	3.16017	0.859649	1	2 × 300
27	Air_20161115_27	Kiruna	2007	1	2	0.389	1.90127	1.90127	1.3125	0.761905	3	2 × 250	0.215	0.757576	0.757576	1	2	2 × 300	0.147	0.530303	0.530303	0.859649	1	2 × 300
28	Air_20161115_28	Ljungbyhed	2007	13	2	0	0	0	0.65625	1.52381	3	2 × 250	5.27	18.5694	5	1	2	2 × 300	0.93	3.35498	3.35498	0.859649	1	2 × 300
106	Air_20161115_106	Blank_2			2	0	0	0	0.65625	1.52381	3	2 × 250	0.121	0.426357	0.426357	1	2	2 × 300	0.082	0.295815	0.295815	0.859649	1	2 × 300
29	Air_20161116_29	Ljungbyhed	2007	3	3	0.23	1.12414	1.12414	1.3125	0.761905	3	2 × 250	2.95	10.3946	5	1	2	2 × 300	15.5	55.9163	8	1.10526	1	2 × 300
30	Air_20161116_30	Kiruna	2006	3	3	0.052	0.254154	0.254154	0.765625	1.30612	3	2 × 250	0.423	1.49049	1.49049	1	2	2 × 300	0.136	0.49062	0.49062	0.859649	1	2 × 300
31	Air_20161116_31	Kiruna	2006	27	3	3.81	18.6217	9	1.3125	1.57644	3	2 × 250	6.78	23.8901	5	1	2	2 × 300	6.46	23.3045	8	1.10526	1	2 × 300
32	Air_20161116_32	Ljungbyhed	2007	47	3	0	0	0	0.65625	1.52381	3	2 × 250	1.44	5.074	5	1	2	2 × 300	0.151	0.544733	0.544733	0.859649	1	2 × 300
33	Air_20161116_33	Ljungbyhed	2007	43	3	0	0	0	0.65625	1.52381	3	2 × 250	5.81	20.4722	5	1	2	2 × 300	0.441	1.59091	1.59091	0.859649	1	2 × 300
34	Air_20161116_34	Kiruna	2007	19	3	0.262	1.28055	1.28055	1.3125	0.761905	3	2 × 250	3.27	11.5222	5	1	2	2 × 300	0.611	2.20418	2.20418	0.859649	1	2 × 300
35	Air_20161116_35	Kiruna	2006	13	3	0	0	0	0.65625	1.52381	3	2 × 250	0.292	1.02889	1.02889	1	2	2 × 300	0.08	0.2886	0.2886	0.859649	1	2 × 300
36	Air_20161116_36	Ljungbyhed	2006	39	3	0	0	0	0.65625	1.52381	3	2 × 250	3.48	12.2622	5	1	2	2 × 300	1.51	5.44733	4	1.10526	1	2 × 300
37	Air_20161116_37	Ljungbyhed	2006	27	3	2.37	11.5836	9	1.3125	0.98062	3	2 × 250	5.79	20.4017	5	1	2	2 × 300	2.66	9.59596	4	1.10526	1	2 × 300
38	Air_20161116_38	Ljungbyhed	2007	11	3	1.1	5.37634	7	1.3125	0.58518	3	2 × 250	4.75	16.7371	5	1	2	2 × 300	6.35	22.9076	8	1.10526	1	2 × 300
107	Air_20161116_107	Blank_1			3	0.075	0.366569	0.366569	0.765625	1.30612	3	2 × 250	0.336	1.18393	1.18393	1	2	2 × 300	0.086	0.310245	0.310245	0.859649	1	2 × 300
39	Air_20161121_39	Ljungbyhed	2007	51	4	0	0	0	0.65625	1.52381	3	2 × 250	2.74	9.65469	5	1	2	2 × 300	0.107	0.386003	0.386003	0.859649	1	2 × 300
40	Air_20161121_40	Ljungbyhed	2007	37	4	0.587	2.86901	2.86901	1.3125	0.761905	3	2 × 250	3.17	11.1698	5	1	2	2 × 300	4.81	17.3521	8	1.10526	1	2 × 300
41	Air_20161121_41	Kiruna	2006	47	4	0.059	0.288368	0.288368	0.765625	1.30612	3	2 × 250	0.893	3.14658	3.14658	1	2	2 × 300	0.861	3.10606	3.10606	0.859649	1	2 × 300
42	Air_20161121_42	Ljungbyhed	2007	9	4	0	0	0	0.65625	1.52381	3	2 × 250	1.8	6.34249	5	1	2	2 × 300	0.164	0.591631	0.591631	0.859649	1	2 × 300
43	Air_20161121_43	Ljungbyhed	2006	45	4	0.265	1.29521	1.29521	1.3125	0.761905	3	2 × 250	2.7	9.51374	5	1	2	2 × 300	4.89	17.6407	8	1.10526	1	2 × 300
44	Air_20161121_44	Kiruna	2007	39	4	1.44	7.03812	7	1.3125	0.766054	3	2 × 250	6.29	22.1635	5	1	2	2 × 300	7.88	28.4271	8	1.10526	1	2 × 300
45	Air_20161121_45	Kiruna	2007	15	4	0.244	1.19257	1.19257	1.3125	0.761905	3	2 × 250	2.86	10.0775	5	1	2	2 × 300	1.82	6.56566	4	1.10526	1	2 × 300
46	Air_20161121_46	Ljungbyhed	2006	11	4	0	0	0	0.65625	1.52381	3	2 × 250	0	0	0	1	2	2 × 300	0	0	0	0.859649	1	2 × 300
47	Air_20161121_47	Kiruna	2007	29	4	6.84	33.4311	9	1.3125	2.83014	3	2 × 250	13.6	47.9211	5	1	2	2 × 300	8.27	29.8341	8	1.10526	1	2 × 300
48	Air_20161121_48	Kiruna	2006	21	4	3.6	17.5953	9	1.3125	1.48955	3	2 × 250	11.3	39.8168	5	1	2	2 × 300	5.54	19.9856	8	1.10526	1	2 × 300
49	Air_20161121_49	Kiruna	2006	11	4	0.064	0.312805	0.312805	0.765625	1.30612	3	2 × 250	1.84	6.48344	5	1	2	2 × 300	2.58	9.30736	4	1.10526	1	2 × 300
50	Air_20161121_50	Ljungbyhed	2007	21	4	0.144	0.703812	0.703812	0.765625	1.30612	3	2 × 250	0	0	0	1	2	2 × 300	0.08	0.2886	0.2886	0.859649	1	2 × 300
51	Air_20161121_51	Ljungbyhed	2007	31	4	0.156	0.762463	0.762463	0.765625	1.30612	3	2 × 250	4.89	17.2304	5	1	2	2 × 300	1.54	5.55556	4	1.10526	1	2 × 300
52	Air_20161121_52	Kiruna	2006	51	4	0.101	0.493646	0.493646	0.765625	1.30612	3	2 × 250	0.86	3.0303	3.0303	1	2	2 × 300	3.24	11.6883	8	1.10526	1	2 × 300
108	Air_20161121_108	Blank_2			4	0.063	0.307918	0.307918	0.765625	1.30612	3	2 × 250	0.529	1.86399	1.86399	1	2	2 × 300	0.734	2.64791	2.64791	0.859649	1	2 × 300
53	Air_20161122_53	Kiruna	2006	43	5	0.086	0.420332	0.420332	0.765625	1.30612	3	2 × 250	0.705	2.48414	2.48414	1	2	2 × 300	0.28	1.0101	1.0101	0.859649	1	2 × 300
54	Air_20161122_54	Kiruna	2007	3	5	0	0	0	0.65625	1.52381	3	2 × 250	0.199	0.701198	0.701198	1	2	2 × 300	0.235	0.847763	0.847763	0.859649	1	2 × 300
55	Air_20161122_55	Kiruna	2007	25	5	5.55	27.1261	9	1.3125	2.29639	3	2 × 250	8.67	30.5497	5	1	2	2 × 300	12.4	44.733	8	1.10526	1	2 × 300
56	Air_20161122_56	Ljungbyhed	2007	15	5	2.39	11.6813	9	1.3125	0.988896	3	2 × 250	4.37	15.3982	5	1	2	2 × 300	1.48	5.33911	4	1.10526	1	2 × 300
57	Air_20161122_57	Kiruna	2007	51	5	0.432	2.11144	2.11144	1.3125	0.761905	3	2 × 250	5.54	19.5208	5	1	2	2 × 300	5.8	20.9235	8	1.10526	1	2 × 300
58	Air_20161122_58	Kiruna	2007	5	5	0.056	0.273705	0.273705	0.765625	1.30612	3	2 × 250	0.967	3.40733	3.40733	1	2	2 × 300	0.408	1.47186	1.47186	0.859649	1	2 × 300
59	Air_20161122_59	Kiruna	2007	49	5	0.345	1.68622	1.68622	1.3125	0.761905	3	2 × 250	2.89	10.1832	5	1	2	2 × 300	0.55	1.98413	1.98413	0.859649	1	2 × 300
60	Air_20161122_60	Ljungbyhed	2006	15	5	0	0	0	0.65625	1.52381	3	2 × 250	6.06	21.3531	5	1	2	2 × 300	1.71	6.16883	4	1.10526	1	2 × 300
61	Air_20161122_61	Ljungbyhed	2006	37	5	0.644	3.14761	3.14761	1.3125	0.761905	3	2 × 250	6.96	24.5243	5	1	2	2 × 300	3.23	11.6522	8	1.10526	1	2 × 300
62	Air_20161122_62	Kiruna	2006	29	5	1.92	9.38416	7	1.3125	1.02141	3	2 × 250	11.7	41.2262	5	1	2	2 × 300	5.36	19.3362	8	1.10526	1	2 × 300
63	Air_20161122_63	Ljungbyhed	2006	17	5	0.071	0.347019	0.347019	0.765625	1.30612	3	2 × 250	4.66	16.42	5	1	2	2 × 300	0.758	2.73449	2.73449	0.859649	1	2 × 300
64	Air_20161122_64	Ljungbyhed	2007	45	5	0.995	4.86315	7	1.3125	0.529322	3	2 × 250	9.01	31.7477	5	1	2	2 × 300	11	39.6825	8	1.10526	1	2 × 300
65	Air_20161122_65	Ljungbyhed	2006	1	5	0	0	0	0.65625	1.52381	3	2 × 250	0.19	0.669486	0.669486	1	2	2 × 300	0.288	1.03896	1.03896	0.859649	1	2 × 300
66	Air_20161122_66	Ljungbyhed	2007	39	5	0	0	0	0.65625	1.52381	3	2 × 250	3.55	12.5088	5	1	2	2 × 300	1.34	4.83405	4	1.10526	1	2 × 300
109	Air_20161122_109	Blank_1			5	0.054	0.26393	0.26393	0.765625	1.30612	3	2 × 250	0.594	2.09302	2.09302	1	2	2 × 300	0.341	1.23016	1.23016	0.859649	1	2 × 300
67	Air_20161123_67	Ljungbyhed	2006	47	6	0	0	0	0.65625	1.52381	3	2 × 250	4.27	15.0458	5	1	2	2 × 300	0.677	2.44228	2.44228	0.859649	1	2 × 300
68	Air_20161123_68	Kiruna	2006	35	6	0.535	2.61486	2.61486	1.3125	0.761905	3	2 × 250	4.06	14.3058	5	1	2	2 × 300	3.72	13.4199	8	1.10526	1	2 × 300
69	Air_20161123_69	Kiruna	2007	45	6	0.135	0.659824	0.659824	0.765625	1.30612	3	2 × 250	1.67	5.88443	5	1	2	2 × 300	4.02	14.5022	8	1.10526	1	2 × 300
70	Air_20161123_70	Ljungbyhed	2006	9	6	0.08	0.391007	0.391007	0.765625	1.30612	3	2 × 250	5.65	19.9084	5	1	2	2 × 300	0.309	1.11472	1.11472	0.859649	1	2 × 300
71	Air_20161123_71	Kiruna	2007	37	6	1.3	6.35386	7	1.3125	0.691577	3	2 × 250	12.1	42.6357	5	1	2	2 × 300	15.1	54.4733	8	1.10526	1	2 × 300
72	Air_20161123_72	Ljungbyhed	2006	31	6	2.19	10.7038	9	1.3125	0.906143	3	2 × 250	18.3	64.482	5	1	2	2 × 300	8.62	31.0967	8	1.10526	1	2 × 300
73	Air_20161123_73	Kiruna	2007	21	6	1.58	7.72239	7	1.3125	0.840532	3	2 × 250	4.69	16.5257	5	1	2	2 × 300	11.6	41.847	8	1.10526	1	2 × 300
74	Air_20161123_74	Ljungbyhed	2007	25	6	0	0	0	0.65625	1.52381	3	2 × 250	3.41	12.0155	5	1	2	2 × 300	1.38	4.97835	4	1.10526	1	2 × 300
75	Air_20161123_75	Kiruna	2006	25	6	4.84	23.6559	9	1.3125	2.00262	3	2 × 250	8.45	29.7745	5	1	2	2 × 300	5.96	21.5007	8	1.10526	1	2 × 300
76	Air_20161123_76	Ljungbyhed	2007	33	6	2.25	10.9971	9	1.3125	0.930969	3	2 × 250	8.01	28.2241	5	1	2	2 × 300	3.01	10.8586	8	1.10526	1	2 × 300
110	Air_20161123_110	Blank_2			6	0	0	0	0.65625	1.52381	3	2 × 250	0.329	1.15927	1.15927	1	2	2 × 300	0.252	0.909091	0.909091	0.859649	1	2 × 300
77	Air_20161124_77	Ljungbyhed	2006	29	7	0.153	0.747801	0.747801	0.765625	1.30612	3	2 × 250	4.07	14.3411	5	1	2	2 × 300	3.67	13.2395	8	1.10526	1	2 × 300
78	Air_20161124_78	Ljungbyhed	2006	23	7	2.81	13.7341	9	1.3125	1.16268	3	2 × 250	6.15	21.6702	5	1	2	2 × 300	4.96	17.8932	8	1.10526	1	2 × 300
79	Air_20161124_79	Kiruna	2007	47	7	0.226	1.10459	1.10459	1.21739	0.821429	4	2 × 300	6.26	22.0578	5.5	1.03979	4	2 × 300	5.17	18.6508	3.54	1	4	2 × 300
80	Air_20161124_80	Kiruna	2006	39	7	0.613	2.99609	2.99609	1.21739	0.821429	4	2 × 300	6.68	23.5377	5.5	1.03979	4	2 × 300	6.59	23.7734	5.5	1	4	2 × 300
81	Air_20161124_81	Kiruna	2006	19	7	0.397	1.94037	1.94037	1.21739	0.821429	4	2 × 300	1.34	4.72163	2.47	0.965517	4	2 × 300	2.49	8.98268	3.54	1	4	2 × 300
82	Air_20161124_82	Ljungbyhed	2006	21	7	1.87	9.13978	5.5	1.46087	1.13753	4	2 × 300	9.53	33.58	5.5	1.03979	4	2 × 300	8.33	30.0505	5.5	1	4	2 × 300
83	Air_20161124_83	Kiruna	2007	31	7	3.08	15.0538	5.5	1.46087	1.87357	4	2 × 300	10.9	38.4073	5.5	1.03979	4	2 × 300	8.21	29.6176	5.5	1	4	2 × 300
84	Air_20161124_84	Ljungbyhed	2007	41	7	0	0	0	0.561873	1.77976	4	2 × 300	18.5	65.1868	5.5	1.03979	4	2 × 300	10.1	36.4358	5.5	1	4	2 × 300
85	Air_20161124_85	Ljungbyhed	2007	7	7	0	0	0	0.561873	1.77976	4	2 × 300	1.98	6.97674	2.47	0.965517	4	2 × 300	0.519	1.87229	1.87229	1	4	2 × 300
86	Air_20161124_86	Ljungbyhed	2007	23	7	1.88	9.18866	5.5	1.46087	1.14361	4	2 × 300	8.96	31.5715	5.5	1.03979	4	2 × 300	7.23	26.0823	5.5	1	4	2 × 300
87	Air_20161124_87	Kiruna	2007	23	7	2.87	14.0274	5.5	1.46087	1.74583	4	2 × 300	7.27	25.6166	5.5	1.03979	4	2 × 300	5.87	21.176	5.5	1	4	2 × 300
88	Air_20161124_88	Kiruna	2006	17	7	0.107	0.522972	0.522972	0.561873	1.77976	4	2 × 300	1.14	4.01691	2.47	0.965517	4	2 × 300	2.11	7.61183	3.54	1	4	2 × 300
89	Air_20161124_89	Kiruna	2006	33	7	1.91	9.33529	5.5	1.46087	1.16186	4	2 × 300	6.37	22.4454	5.5	1.03979	4	2 × 300	4.04	14.5743	3.54	1	4	2 × 300
90	Air_20161124_90	Kiruna	2007	17	7	0.404	1.97458	1.97458	1.21739	0.821429	4	2 × 300	7.77	27.3784	5.5	1.03979	4	2 × 300	3.56	12.8427	3.54	1	4	2 × 300
111	Air_20161124_111	Blank_1			7	0	0	0	0.561873	1.77976	4	2 × 300	0.66	2.32558	2.32558	0.965517	4	2 × 300	0.266	0.959596	0.959596	1	4	2 × 300
91	Air_20161125_91	Ljungbyhed	2007	1	8	0.066	0.322581	0.322581	0.561873	1.77976	4	2 × 300	2.24	7.89288	2.47	0.965517	4	2 × 300	8.88	32.0346	5.5	1	4	2 × 300
92	Air_20161125_92	Kiruna	2006	9	8	0	0	0	0.561873	1.77976	4	2 × 300	0.224	0.789288	0.789288	0.965517	4	2 × 300	0.302	1.08947	1.08947	1	4	2 × 300
93	Air_20161125_93	Kiruna	2007	33	8	3.3	16.129	5.5	1.46087	2.0074	4	2 × 300	10.4	36.6455	5.5	1.03979	4	2 × 300	20.9	75.3968	5.5	1	4	2 × 300
94	Air_20161125_94	Ljungbyhed	2006	33	8	3.24	15.8358	5.5	1.46087	1.9709	4	2 × 300	7.93	27.9422	5.5	1.03979	4	2 × 300	8.37	30.1948	5.5	1	4	2 × 300
95	Air_20161125_95	Kiruna	2007	35	8	1.59	7.77126	5.5	1.46087	0.967202	4	2 × 300	22.8	80.3383	5.5	1.03979	4	2 × 300	19.8	71.4286	5.5	1	4	2 × 300
96	Air_20161125_96	Kiruna	2007	7	8	0	0	0	0.561873	1.77976	4	2 × 300	0.175	0.616631	0.616631	0.965517	4	2 × 300	0.068	0.24531	0.24531	1	4	2 × 300
97	Air_20161125_97	Ljungbyhed	2006	5	8	0	0	0	0.561873	1.77976	4	2 × 300	0.405	1.42706	1.42706	0.965517	4	2 × 300	0.112	0.40404	0.40404	1	4	2 × 300
98	Air_20161125_98	Ljungbyhed	2006	19	8	2.14	10.4594	5.5	1.46087	1.30177	4	2 × 300	5.48	19.3094	2.47	0.965517	4	2 × 300	3.47	12.518	3.54	1	4	2 × 300
99	Air_20161125_99	Kiruna	2006	5	8	0.051	0.249267	0.249267	0.561873	1.77976	4	2 × 300	0.369	1.30021	1.30021	0.965517	4	2 × 300	0.166	0.598846	0.598846	1	4	2 × 300
100	Air_20161125_100	Kiruna	2006	31	8	1.4	6.84262	5.5	1.46087	0.851625	4	2 × 300	5.49	19.3446	2.47	0.965517	4	2 × 300	1.77	6.38528	3.54	1	4	2 × 300
101	Air_20161125_101	Kiruna	2007	11	8	0.053	0.259042	0.259042	0.561873	1.77976	4	2 × 300	0.929	3.27343	3.27343	0.965517	4	2 × 300	3.57	12.8788	3.54	1	4	2 × 300
102	Air_20161125_102	Ljungbyhed	2006	51	8	0.051	0.249267	0.249267	0.561873	1.77976	4	2 × 300	2.09	7.36434	2.47	0.965517	4	2 × 300	6.77	24.4228	5.5	1	4	2 × 300
103	Air_20161125_103	Kiruna	2007	41	8	0.684	3.34311	3.34311	1.21739	0.821429	4	2 × 300	12.2	42.988	5.5	1.03979	4	2 × 300	20.9	75.3968	5.5	1	4	2 × 300
104	Air_20161125_104	Kiruna	2007	9	8	0.061	0.298143	0.298143	0.561873	1.77976	4	2 × 300	0.327	1.15222	1.15222	0.965517	4	2 × 300	0.162	0.584416	0.584416	1	4	2 × 300
112	Air_20161125_112	Blank_2			8	0	0	0	0.561873	1.77976	4	2 × 300	1.03	3.62932	3.62932	0.965517	4	2 × 300	1.3	4.68975	3.54	1	4	2 × 300
